# Supplementary material for: Push–pull unsymmetrical substitution in nickel(ii) complexes with tetradentate N2O2 Schiff base ligands: synthesis, structures and linear–nonlinear optical studies
Source: Royal Society of Chemistry journal article supplement (doi:10.1039/c9dt01216h), 2019-01-01
Supplement: c9dt01216h1.pdf [file c9dt01216h1.pdf]

## Electronic Supplementary Information (ESI) for:

### Push-pull unsymmetrical substitution in nickel(II) complexes with tetradentate N<sub>2</sub>O<sub>2</sub> Schiff base ligands: synthesis, structures and linear-nonlinear optical studies

Luca Rigamonti, Alessandra Forni, Stefania Righetto and Alessandro Pasini

#### Index

|          |                                                                                                                                                                                                                                                                                                                                                                                                                                 |
|----------|---------------------------------------------------------------------------------------------------------------------------------------------------------------------------------------------------------------------------------------------------------------------------------------------------------------------------------------------------------------------------------------------------------------------------------|
| page S2  | <b>Experimental section (cont.)</b>                                                                                                                                                                                                                                                                                                                                                                                             |
| page S7  | <b>Table S1</b> Crystallographic and data collection parameters for <b>3c</b> ·CHCl <sub>3</sub> , <b>3g</b> ·EtOH and <b>3j</b> .                                                                                                                                                                                                                                                                                              |
| page S8  | <b>Table S2</b> Computed excitation energies, oscillator strengths and analysis of the most important contributions to the transitions for compounds <b>3</b> and selected analogue copper(II) complexes <b>Cu3a</b> and <b>Cu3l</b> .                                                                                                                                                                                          |
| page S10 | <b>Fig. S1</b> Isodensity surface plot of the PBE0/6-311++G(d,p) frontier orbitals of <b>3c</b> and <b>3j</b> mainly involved in the computed transitions.                                                                                                                                                                                                                                                                      |
| page S11 | <b>Fig. S2</b> UV-visible absorption spectra of <b>3c</b> : dilution studies from 10 <sup>-3</sup> down to 10 <sup>-5</sup> mol L <sup>-1</sup> CHCl <sub>3</sub> solutions, solvatochromism at 5 × 10 <sup>-5</sup> mol L <sup>-1</sup> solutions in solvents from low polar toluene to high polar methanol, and addition of increasing amount of DMSO to the 10 <sup>-4</sup> mol L <sup>-1</sup> CHCl <sub>3</sub> solution. |
| page S12 | <b>Fig. S3</b> UV-visible absorption spectra of <b>3j</b> : solvatochromism at 5 × 10 <sup>-5</sup> mol L <sup>-1</sup> solutions in solvents from low polar toluene to high polar methanol, and addition of increasing amount of DMSO to the 10 <sup>-4</sup> mol L <sup>-1</sup> CHCl <sub>3</sub> solution.                                                                                                                  |
| page S13 | <b>References</b>                                                                                                                                                                                                                                                                                                                                                                                                               |

## Experimental section (cont.)

### Synthetic procedures for compounds 1

**[Ni(Br<sup>sal</sup>)<sub>2</sub>(H<sub>2</sub>O)<sub>2</sub>] (1b).**<sup>1,2</sup> This yellow solid was synthesized as **1a** from 5-Br-salH (281.7 mg, 1.40 mmol), ethanolic KOH (14.0 mL of a 0.1 mol L<sup>-1</sup> solution, 1.40 mmol) and solid Ni(AcO)<sub>2</sub>·4H<sub>2</sub>O (174.2 mg, 0.70 mmol) (306.8 mg, 89%). Anal. Calcd (%) for C<sub>14</sub>H<sub>12</sub>Br<sub>2</sub>NiO<sub>6</sub> (494.74): C, 33.99; H, 2.44. Found: C, 34.09; H, 2.60. IR (KBr): 3445 (ν<sub>O-H</sub>), 2906 (ν<sub>CHO</sub>), 1631 (ν<sub>C=O</sub>) cm<sup>-1</sup>. UV-vis (CHCl<sub>3</sub>): 25060 (4130), 28650 (4620).

**[Ni(H<sup>sal</sup>)<sub>2</sub>(H<sub>2</sub>O)<sub>2</sub>] (1c).**<sup>1-4</sup> This light green solid was synthesized as above from salH (1220.4 mg, 10.00 mmol), ethanolic KOH (20.0 mL of a 0.5 mol L<sup>-1</sup> solution, 10.00 mmol) and solid Ni(AcO)<sub>2</sub>·4H<sub>2</sub>O (1242.6 mg, 5.00 mmol) (1552.0 mg, 92%). Anal. Calcd (%) for C<sub>14</sub>H<sub>14</sub>NiO<sub>6</sub>·0.25H<sub>2</sub>O (341.46): C, 49.25; H, 4.28. Found: C, 49.41; H, 4.58. IR (KBr): 3452 (ν<sub>O-H</sub>), 2790 (ν<sub>CHO</sub>), 1653 (ν<sub>C=O</sub>) cm<sup>-1</sup>. UV-vis (CHCl<sub>3</sub>): 25910 (3280), 30210 (5510).

**[Ni(Me<sup>sal</sup>)<sub>2</sub>(H<sub>2</sub>O)<sub>2</sub>] (1d).** This yellow-green compound was synthesized as above from 5-Me-salH (500.2 mg, 3.68 mmol), ethanolic KOH (7.4 mL of a 0.5 mol L<sup>-1</sup> solution, 3.70 mmol) and Ni(AcO)<sub>2</sub>·4H<sub>2</sub>O (456.9 mg, 1.84 mmol) (518.6 mg, 77%). Anal. Calcd (%) for C<sub>16</sub>H<sub>18</sub>NiO<sub>6</sub>·0.5H<sub>2</sub>O (374.01): C, 51.38; H, 5.12. Found: C, 50.92; H, 4.93. IR (KBr): 3456 (ν<sub>O-H</sub>), 1633 (ν<sub>C=O</sub>) cm<sup>-1</sup>. UV-vis (CHCl<sub>3</sub>): 25060 (2300), 28990 (5620).

**[Ni(5-OMe-sal)<sub>2</sub>(H<sub>2</sub>O)<sub>2</sub>] (1e).** This yellow-green compound was synthesized as above from 5-OMe-salH (500.0 μL, 4.00 mmol), ethanolic KOH (8 mL of a 0.5 mol L<sup>-1</sup> solution, 4.00 mmol) and Ni(AcO)<sub>2</sub>·4H<sub>2</sub>O (497.6 mg, 2.00 mmol) (364.0 mg, 46%). Anal. Calcd (%) for C<sub>16</sub>H<sub>18</sub>NiO<sub>8</sub> (397.00): C, 48.41; H, 4.57. Found: C, 48.39; H, 4.55. IR (KBr): 3457 (ν<sub>O-H</sub>), 2787 (ν<sub>CHO</sub>), 1659 (ν<sub>C=O</sub>) cm<sup>-1</sup>. UV-vis (CHCl<sub>3</sub>): 23700 sh (2550), 27100 (6830).

### Synthetic procedures for compounds 2

**[Ni(Br<sup>L</sup>)<sub>2</sub>] (2b).**<sup>5</sup> 5-Br-salH (214.2 mg, 1.07 mmol) was dissolved in ethanolic KOH (10.7 mL of a 0.1 mol L<sup>-1</sup> solution, 1.07 mmol) and Ni(AcO)<sub>2</sub>·4H<sub>2</sub>O (132.2 mg, 0.53 mmol) was added under stirring, with the formation of a green precipitate. The slurry was refluxed for 1 h, then tn (134 μL, 1.61 mmol) was added, with the formation of a brown solution and after few minutes of a yellow precipitate. The mixture was refluxed for 3 h, cooled with an ice bath, and **2b** was recovered by filtration as brownish-yellow solid, washed with EtOH, tPr<sub>2</sub>O and dried under vacuum (225.3 mg, 87%). Anal. Calcd (%) for C<sub>20</sub>H<sub>24</sub>Br<sub>2</sub>N<sub>4</sub>NiO<sub>2</sub> (570.93): C, 42.07; H, 4.24; N, 9.81. Found: C, 42.41; H, 4.37; N, 9.63. MS (ESI): *m/z* 571 ([M + H]<sup>+</sup>, 25%), 593 ([M + Na]<sup>+</sup>, 15), 885 ([M + Ni(Br<sup>L</sup>)]<sup>+</sup>, 80), 1165 ([2M + Na]<sup>+</sup>, 100). UV-vis: 26110 (7490). IR (KBr): 3326, 3257 (ν<sub>NH2</sub>), 1627 (ν<sub>C=N</sub>).

**[Ni(<sup>H</sup>L)<sub>2</sub>] (2c).**<sup>6</sup> salH (1.50 mL, 20.40 mmol) was dissolved in ethanolic KOH (40.8 mL of a 0.5 mol L<sup>-1</sup> solution, 20.40 mmol) and Ni(AcO)<sub>2</sub>·4H<sub>2</sub>O (2540.0 mg, 10.20 mmol) was added under stirring. The yellow mixture was stirred at 70 °C for 1 h, with the formation of a light green precipitate, and then tn (2.1 mL, 25.20 mmol) was added. The brown solution was refluxed for 3 h. The mixture was cooled with an ice bath, and **2c** was recovered by filtration as pale yellow solid, washed with EtOH, acetone and dried under vacuum (2640.0 mg, 61%). Anal. Calcd (%) for C<sub>20</sub>H<sub>26</sub>N<sub>4</sub>NiO<sub>2</sub>·0.5H<sub>2</sub>O (422.15): C, 56.90; H, 6.45; N, 13.27. Found: C, 56.51; H, 6.47; N, 13.07. MS (ESI): *m/z* 235 ([Ni(<sup>H</sup>L)]<sup>+</sup>, 45%), 267 ([Ni(<sup>H</sup>L)(MeOH)]<sup>+</sup>, 100), 413 ([M + H]<sup>+</sup>, 25), 435 ([M + Na]<sup>+</sup>, 25), 647 ([M + Ni(<sup>H</sup>L)]<sup>+</sup>, 30). IR (KBr): 3456 (ν<sub>O-H</sub>), 3326, 3255 (ν<sub>NH2</sub>), 1629 (ν<sub>C=N</sub>) cm<sup>-1</sup>. UV-vis: 27250 (7450).

**[Ni(<sup>Me</sup>L)<sub>2</sub>] (2d).** 5-Me-salH (408.3 mg, 3.00 mmol) was dissolved in ethanolic KOH (6.0 mL of a 0.5 mol L<sup>-1</sup> solution, 3.00 mmol) and Ni(AcO)<sub>2</sub>·4H<sub>2</sub>O (373.3 mg, 1.50 mmol) was added under stirring. The reaction mixture was refluxed for 1 h, then tn (335 μL, 4.00 mmol) was added with the formation of a brown solution, which was refluxed for 3 h. The dark brown solution was left at slow evaporation for few days, yielding **2d** as light green solid that filtered, washed with EtOH, <sup>i</sup>Pr<sub>2</sub>O and dried under vacuum. Further product was recovered treating the reaction solution with water (691.1 mg, 92%). Anal. Calcd (%) for C<sub>22</sub>H<sub>30</sub>N<sub>4</sub>NiO<sub>2</sub>·0.5EtOH·2H<sub>2</sub>O (500.26): C, 55.22; H, 7.45; N, 11.20. Found: C, 55.09; H, 7.43; N, 11.10. MS (ESI): *m/z* 249 ([Ni(<sup>Me</sup>L)]<sup>+</sup>, 20%), 267 ([Ni(<sup>Me</sup>L)(H<sub>2</sub>O)]<sup>+</sup>, 100), 441 ([M + H]<sup>+</sup>, 10), 463 ([M + Na]<sup>+</sup>, 20), 689 ([M + Ni(<sup>Me</sup>L)]<sup>+</sup>, 40). IR (KBr): 3449 (ν<sub>O-H</sub>), 3317, 3276 (ν<sub>NH2</sub>), 1639 (ν<sub>C=N</sub>) cm<sup>-1</sup>. UV-vis: 26180 (7240).

### Synthetic procedures for compounds 3 and 4

**[Ni(5'-OMe-saltn)] (3c).** *First method 1e + 2c:* **1e** (172.5 mg, 0.43 mmol) and **2c** (172.5 mg, 0.43 mmol) were dissolved in EtOH (30 mL) and refluxed for 5 h. The mixture was cooled with an ice bath and **3c** was filtered as green solid, washed with cold EtOH, <sup>i</sup>Pr<sub>2</sub>O and dried under vacuum (231.0 mg, 68%). Anal. Calcd for C<sub>18</sub>H<sub>18</sub>N<sub>2</sub>NiO<sub>3</sub>·1.5H<sub>2</sub>O (396.06): C, 54.59; H, 5.34; N, 7.07. Found: C, 54.65; H, 5.22; N, 6.81. MS (ESI): *m/z* 369 ([M + 1]<sup>+</sup>, 100%), 737 ([2M + 1]<sup>+</sup>, 20), 759 ([2M + Na]<sup>+</sup>, 25). IR (KBr): 3457 (ν<sub>O-H</sub>), 1626 (ν<sub>C=N</sub>). <sup>1</sup>H NMR (CDCl<sub>3</sub>, 298 K, 400 MHz): δ 1.31 (3H, H<sub>2</sub>O), 1.89 (2H, tn central CH<sub>2</sub>), 3.55 (4H, tn lateral CH<sub>2</sub>), 3.74 (3H, OMe), 6.5–7.2 (9H, aromatic and N=CH) ppm.

**[Ni(5,5'-Br<sub>2</sub>-saltn)] (3d).** This compound was synthesized with a modification of literature procedures.<sup>7,8</sup> 5-Br-salH (200.0 mg, 0.99 mmol) and tn (42 μL, 0.50 mmol) were dissolved in EtOH (15 mL) and the yellow mixture was refluxed for 30 minutes. NiCl<sub>2</sub>·6H<sub>2</sub>O (122.3 mg, 0.51 mmol) and Et<sub>3</sub>N (1 mL) were then added and the mixture was refluxed for 4 h. The green solid was

filtered, washed with EtOH,  $i$ Pr<sub>2</sub>O and dried under vacuum (186.6 mg, 70%). Anal. Calcd (%) for C<sub>17</sub>H<sub>14</sub>Br<sub>2</sub>N<sub>2</sub>NiO<sub>2</sub>·2H<sub>2</sub>O (532.84): C, 38.32; H, 3.40; N, 5.26. Found: C, 37.97; H, 3.42; N, 5.27. MS (ESI):  $m/z$  497 ([M + 1]<sup>+</sup>, 100%). IR (KBr): 3454 ( $\nu_{\text{O-H}}$ ), 1626 ( $\nu_{\text{C=N}}$ ) cm<sup>-1</sup>. <sup>1</sup>H NMR: not soluble.

**[Ni(5-Br-saltn)] (3e) and isolation of the intermediates [Ni<sub>2</sub>( $\mu$ -BrL)<sub>2</sub>(<sup>H</sup>sal)<sub>2</sub>] (4e) and [Ni<sub>2</sub>( $\mu$ -<sup>H</sup>L)(<sup>Br</sup>sal)<sub>2</sub>] (4e').** *First method 1c + 2b:* **1c** (55.3 mg, 0.16 mmol) and **2b** (93.8 mg, 0.16 mmol) were suspended in EtOH (10 mL) and refluxed for 12 h. The intermediate **4e** was filtered as light green solid, washed with EtOH,  $i$ Pr<sub>2</sub>O and dried under vacuum (117.0 mg, 80%). Anal. Calcd (%) for C<sub>34</sub>H<sub>34</sub>Br<sub>2</sub>N<sub>4</sub>Ni<sub>2</sub>O<sub>6</sub> (871.85): C, 46.84; H, 3.93; N, 6.43. Found: C, 47.17; H, 4.10; N, 6.13. MS (ESI):  $m/z$  313 ([Ni(<sup>Br</sup>L)]<sup>+</sup>, 10%), 356 ([Ni(<sup>Br</sup>L)(MeOH)]<sup>+</sup>, 100). IR (KBr): 3342, 3293 ( $\nu_{\text{NH}_2}$ ), 1652 sh, 1631 ( $\nu_{\text{C=N}}$ ) cm<sup>-1</sup>. Further refluxing in EtOH or drying under vacuum of **4e** did not yield **3e**.

*Second method 1b + 2c:* **1b** (125.7 mg, 0.30 mmol) and **2c** (150.4 mg, 0.30 mmol) were suspended in EtOH (30 mL) and refluxed for 12 h, yielding **4e'** as light green solid (138.1 mg, 49%). Anal. Calcd (%) for C<sub>34</sub>H<sub>34</sub>Br<sub>2</sub>N<sub>4</sub>Ni<sub>2</sub>O<sub>6</sub>·2H<sub>2</sub>O (907.88): C, 44.98; H, 4.22; N, 6.17. Found: C, 45.15; H, 4.42; N, 5.93. MS (ESI):  $m/z$  235 ([Ni(<sup>H</sup>L)]<sup>+</sup>, 100%), 267 ([Ni(<sup>H</sup>L)(MeOH)]<sup>+</sup>, 70). IR (KBr): 3349, 3293 ( $\nu_{\text{NH}_2}$ ), 1638 ( $\nu_{\text{C=N}}$ ) cm<sup>-1</sup>. **4e'** (135.1 mg, 0.15 mmol) was dissolved in EtOH (10 mL) and DMF (5 mL) and the brown solution was left under reflux for 3 h, after which  $i$ Pr<sub>2</sub>O (20 mL) was added and the mixture was left at slow evaporation. After two days **3e** precipitated as dark green solid that was recovered by filtration, washed with  $i$ Pr<sub>2</sub>O and dried under vacuum (70.6 mg, 54%). Anal. Calcd (%) for C<sub>17</sub>H<sub>15</sub>BrN<sub>2</sub>NiO<sub>2</sub>·H<sub>2</sub>O (440.43): C, 46.84; H, 3.93; N, 6.43. Found: C, 46.61; H, 4.02; N, 5.98. MS (ESI):  $m/z$  419 ([M + 1]<sup>+</sup>, 100%), 859 ([2M + Na]<sup>+</sup>, 20). IR (KBr): 3447 ( $\nu_{\text{O-H}}$ ), 1624 ( $\nu_{\text{C=N}}$ ) cm<sup>-1</sup>. <sup>1</sup>H NMR (CDCl<sub>3</sub>, 298 K, 400 MHz):  $\delta$  1.11 (2H, H<sub>2</sub>O), 1.84 (2H, tn central CH<sub>2</sub>), 3.54 (4H, tn lateral CH<sub>2</sub>), 5.8–7.8 (9H, aromatic and N=CH) ppm.

**[Ni(5-Br-5'-Me-saltn)] (3f) and isolation of the intermediate [Ni<sub>2</sub>( $\mu$ -BrL)<sub>2</sub>(<sup>Me</sup>sal)<sub>2</sub>] (4f).** *First method 1d + 2b:* **1d** (109.5 mg, 0.30 mmol) and **2b** (171.3 mg, 0.30 mmol) were suspended in EtOH (20 mL) and refluxed for 12 h, yielding the intermediate **4f** as light green solid (217.1 mg, 75%). Anal. Calcd (%) for C<sub>36</sub>H<sub>38</sub>Br<sub>2</sub>N<sub>4</sub>Ni<sub>2</sub>O<sub>6</sub>·0.5H<sub>2</sub>O (908.91): C, 47.57; H, 4.32; N, 6.16. Found: C, 47.51; H, 4.20; N, 5.87. IR (KBr): 3451 ( $\nu_{\text{O-H}}$ ), 3339, 3290 ( $\nu_{\text{NH}_2}$ ), 1631 ( $\nu_{\text{C=N}}$ ). The light green solid **4f** was dried under vacuum for several days, and the color changed to military green. The solid was then suspended in  $i$ Pr<sub>2</sub>O, filtered and dried under vacuum yielding **3f** as military green solid (177.6 mg, 67%). Anal. Calcd (%) for C<sub>18</sub>H<sub>17</sub>BrN<sub>2</sub>NiO<sub>2</sub> (431.94): C, 50.05; H, 3.97; N, 6.49. Found: C, 50.03; H, 4.15; N, 6.51. MS (ESI):  $m/z$  433 ([M + 1]<sup>+</sup>, 100%). IR (KBr): 1624 ( $\nu_{\text{C=N}}$ ) cm<sup>-1</sup>. *Second method 1b + 2d:* **1b** (155.5 mg, 0.31 mmol) and **2d** (154.4 mg, 0.31 mmol) were suspended in EtOH (20 mL) and refluxed for 12 h, yielding directly **3f** as green solid (228.8 mg,

82%). Anal. Calcd (%) for  $C_{18}H_{17}BrN_2NiO_2 \cdot H_2O$  (449.95): C, 48.05; H, 4.26; N, 6.23. Found: C, 47.74; H, 4.19; N, 5.89. MS (ESI):  $m/z$  433 ( $[M + 1]^+$ , 90%), 863 ( $[2M + 1]^+$ , 100), 885 ( $[2M + Na]^+$ , 50). IR (KBr): 3439 ( $\nu_{O-H}$ ), 1626 ( $\nu_{C=N}$ )  $cm^{-1}$ .  $^1H$  NMR ( $CDCl_3$ , 298 K, 400 MHz):  $\delta$  0.90 (2H,  $H_2O$ ), 1.81 (2H, tn central  $CH_2$ ), 2.30 (3H, Me), 3.52 (4H, tn lateral  $CH_2$ ), 6.8–7.2 (8H, aromatic and  $N=CH$ ) ppm.

**[Ni(5-Br-5'-OMe-saltn)] (3g) and isolation of the intermediate  $[Ni_2(\mu-BrL)_2(OMe\text{sal})_2]$  (4g).** *First method 1e + 2b:* **1e** (119.1 mg, 0.30 mmol) and **2b** (171.3 mg, 0.30 mmol) were suspended in EtOH (30 mL) and refluxed for 12 h. The green solid **4g** was filtered and dried under vacuum (196.7 mg, 67%). Anal. Calcd (%) for  $C_{36}H_{38}Br_2N_4Ni_2O_8 \cdot H_2O$  (931.90): C, 46.40; H, 4.11; N, 6.01. Found: C, 46.64; H, 4.11; N, 5.84. MS (ESI):  $m/z$  346 ( $[Ni(BrL)(MeOH)]^+$ , 100%). IR (KBr): 3444 ( $\nu_{O-H}$ ), 3341, 3290 ( $\nu_{NH_2}$ ), 1637 ( $\nu_{C=N}$ )  $cm^{-1}$ . The product **3g** precipitated as brown solid from the remaining reaction mixture, left for one day at room temperature, or refluxing the intermediate **4g** in EtOH for further 24 h (111.2 mg, 37%). Anal. Calcd (%) for  $C_{18}H_{17}BrN_2NiO_3$  (447.94): C, 48.26; H, 3.83; N, 6.25. Found: C, 48.47; H, 3.79; N, 5.95. MS (ESI):  $m/z$  449 ( $[M + 1]^+$ , 100%). IR (KBr): 1612, 1597 ( $\nu_{C=N}$ )  $cm^{-1}$ .  $^1H$  NMR ( $CDCl_3$ , 298 K, 400 MHz):  $\delta$  1.90 (2H, tn central  $CH_2$ ), 3.74 (3H, OMe), 3.81+3.83 (4H, tn lateral  $CH_2$ ), 6.5–7.5 (8H, aromatic and  $N=CH$ ) ppm. Crystals suitable for X-ray diffraction were obtained by slow diffusion of  $^iPr_2O$  into an EtOH solution of the title compound.

**[Ni(5,5'-(NO<sub>2</sub>)<sub>2</sub>-saltn)] (3h).** This compound was synthesized with a modification of literature procedures.<sup>7,8</sup> 5-NO<sub>2</sub>-salH (168.3 mg, 1.01 mmol) and tn (43  $\mu$ L, 0.51 mmol) were dissolved in EtOH (15 mL) and the yellow mixture was refluxed for 30 minutes.  $NiCl_2 \cdot 6H_2O$  (121.9 mg, 0.51 mmol) and  $Et_3N$  (1 mL) were then added and the mixture was refluxed for 4 h. The green solid was filtered, washed with EtOH,  $^iPr_2O$  and dried under vacuum (193.0 mg, 80%). Anal. Calcd (%) for  $C_{17}H_{14}N_4NiO_6 \cdot 2.5H_2O$  (474.05): C, 43.07; H, 4.04; N, 11.82. Found: C, 42.82; H, 3.76; N, 11.72. MS (ESI):  $m/z$  429 ( $[M + 1]^+$ , 100%). IR (KBr): 3454 ( $\nu_{O-H}$ ), 1634 ( $\nu_{C=N}$ ), 1308 ( $\nu_{NO_2}$ )  $cm^{-1}$ .  $^1H$  NMR: not soluble.

**[Ni(5-NO<sub>2</sub>-5'-Br-saltn)] (3i).** *First method 1a + 2b:* **1a** (170.9 mg, 0.30 mmol) and **2b** (128.2 mg, 0.30 mmol) were suspended in EtOH (30 mL) and refluxed for 5 h. The green product **3i** was filtered, washed with EtOH,  $^iPr_2O$  and dried under vacuum (238.3 mg, 82%). Anal. Calcd (%) for  $C_{17}H_{14}BrN_3NiO_4 \cdot H_2O$  (480.92): C, 42.46; H, 3.35; N, 8.74. Found: C, 42.42; H, 3.38; N, 8.73. MS (ESI):  $m/z$  464 ( $[M + 1]^+$ , 50%), 949 ( $[2M + Na]^+$ , 100). IR (KBr): 3438 ( $\nu_{O-H}$ ), 1650, 1627 ( $\nu_{C=N}$ ), 1308 ( $\nu_{NO_2}$ )  $cm^{-1}$ . *Second method 1b + 2a:* **1b** (152.4 mg, 0.30 mmol) and **2a** (155.3 mg, 0.30 mmol) were suspended in EtOH (30 mL) and refluxed for 5 h. The green product **3i** was filtered, washed with EtOH,  $^iPr_2O$  and dried under vacuum (184.5 mg, 64%). Anal. Calcd (%) for

$C_{17}H_{14}BrN_3NiO_4 \cdot H_2O$  (480.93): C, 42.46; H, 3.35; N, 8.74. Found: C, 42.62; H, 3.48; N, 8.67. MS (ESI):  $m/z$  486 ( $[M + Na]^+$ , 50%), 949 ( $[2M + Na]^+$ , 100). IR (KBr): 3439 ( $\nu_{O-H}$ ), 1650, 1627 ( $\nu_{C=N}$ ), 1308 ( $\nu_{NO_2}$ )  $cm^{-1}$ .  $^1H$  NMR: not soluble.

**[Ni(5-NO<sub>2</sub>-saltn)] (3j).** *First method 1c + 2a:* **1c** (152.2 mg, 0.45 mmol) and **2a** (171.8 mg, 0.45 mmol) were suspended in EtOH (50 mL) and refluxed for 5 h. The light brown solid **3j** was filtered, washed with EtOH,  $^iPr_2O$  and dried under vacuum (230.1 mg, 66%). Anal. Calcd (%) for  $C_{17}H_{15}N_3NiO_4 \cdot 0.5H_2O$  (393.02): C, 51.95; H, 4.10; N, 10.69. Found: C, 52.26; H, 4.46; N, 10.33. MS (ESI):  $m/z$  384 ( $[M + 1]^+$ , 100%), 406 ( $[M + Na]^+$ , 25), 789 ( $[2M + Na]^+$ , 90). IR (KBr): 3447 ( $\nu_{O-H}$ ), 1624, 1599 ( $\nu_{C=N}$ ), 1308 ( $\nu_{NO_2}$ )  $cm^{-1}$ . Crystals suitable for X-ray diffraction were obtained by slow diffusion of  $^iPr_2O$  into a  $CHCl_3$  solution of the title compound. *Second method 1a + 2c:* **1a** (127.9 mg, 0.30 mmol) and **2c** (122.7 mg, 0.30 mmol) were suspended in EtOH (30 mL) and refluxed for 5 h. The brown solid **3j** was filtered, washed with EtOH,  $^iPr_2O$  and dried under vacuum (135.7 mg, 55%). Anal. Calcd (%) for  $C_{17}H_{15}N_3NiO_4 \cdot 1.5H_2O$  (411.04): C, 49.68; H, 4.41; N, 10.22. Found: C, 49.59; H, 4.14; N, 10.17. IR (KBr): 3446 ( $\nu_{O-H}$ ), 1624, 1599 ( $\nu_{C=N}$ ), 1308 ( $\nu_{NO_2}$ )  $cm^{-1}$ .  $^1H$  NMR ( $CDCl_3$ , 298 K, 400 MHz):  $\delta$  1.54 (3H,  $H_2O$ ), 1.99 (2H, tn central  $CH_2$ ), 3.62+3.66 (4H, tn lateral  $CH_2$ ), 6.6–8.1 (9H, aromatic and  $N=CH$ ) ppm.

**[Ni(5-NO<sub>2</sub>-5'-Me-saltn)] (3k).** *First method 1d + 2a:* **1d** (109.5 mg, 0.30 mmol) and **2a** (150.9 mg, 0.30 mmol) were suspended in EtOH (30 mL) and refluxed for 7 days, yielding the product **3k** as yellow-earth solid, washed with EtOH,  $^iPr_2O$  and dried under vacuum (134.5 mg, 50%). Anal. Calcd (%) for  $C_{18}H_{17}N_3NiO_4 \cdot 3H_2O$  (452.09): C, 47.82; H, 5.13; N, 9.29. Found: C, 48.05; H, 4.97; N, 9.30. MS (ESI):  $m/z$  398 ( $[M + 1]^+$ , 100%), 817 ( $[2M + Na]^+$ , 60). IR (KBr): 3446 ( $\nu_{O-H}$ ), 1628, 1597 ( $\nu_{C=N}$ ), 1309 ( $\nu_{NO_2}$ )  $cm^{-1}$ . The reaction was monitored by infrared spectroscopy, where it was clearly visible the disappearance of **2a** ( $NH_2$  bands around 3200  $cm^{-1}$ ,  $C=N$  band at 1640  $cm^{-1}$ ) and the appearance of the new  $C=N$  stretching at 1628  $cm^{-1}$  of **3k** (the formation of the hypothetical intermediate **4k** was never detected). *Second method 1a + 2d:* **1a** (76.4 mg, 0.18 mmol) and **2d** (84.6 mg, 0.18 mmol) were suspended in EtOH (15 mL) and refluxed for 5 h. The product **3k** was filtered as yellow-earth solid, washed with EtOH,  $^iPr_2O$  and dried under vacuum (114.5 mg, 85%). Anal. Calcd (%) for  $C_{18}H_{17}N_3NiO_4 \cdot H_2O$  (416.05): C, 51.96; H, 4.60; N, 10.10. Found: C, 51.92; H, 4.85; N, 10.35. MS (ESI):  $m/z$  398 ( $[M + 1]^+$ , 100%). IR (KBr): 3445 ( $\nu_{O-H}$ ), 1629, 1598 ( $\nu_{C=N}$ ), 1308 ( $\nu_{NO_2}$ )  $cm^{-1}$ .  $^1H$  NMR: not soluble

**Table S1** Crystallographic and data collection parameters for **3c**·CHCl<sub>3</sub>, **3g**·EtOH and **3j**.

|                                                                                                                                                     | <b>3c</b> ·CHCl <sub>3</sub>                                                       | <b>3g</b> ·EtOH                                                                                    | <b>3j</b>                                                       |
|-----------------------------------------------------------------------------------------------------------------------------------------------------|------------------------------------------------------------------------------------|----------------------------------------------------------------------------------------------------|-----------------------------------------------------------------|
| <i>Crystal Data</i>                                                                                                                                 |                                                                                    |                                                                                                    |                                                                 |
| Moiety formula                                                                                                                                      | C <sub>18</sub> H <sub>18</sub> N <sub>2</sub> NiO <sub>3</sub> ·CHCl <sub>3</sub> | C <sub>18</sub> H <sub>17</sub> BrN <sub>2</sub> NiO <sub>3</sub> ·C <sub>2</sub> H <sub>6</sub> O | C <sub>17</sub> H <sub>15</sub> N <sub>3</sub> NiO <sub>4</sub> |
| <i>M</i>                                                                                                                                            | 488.42                                                                             | 494.02                                                                                             | 384.03                                                          |
| Crystal system                                                                                                                                      | Triclinic                                                                          | Monoclinic                                                                                         | Monoclinic                                                      |
| Space group                                                                                                                                         | <i>P</i> -1 (n. 2)                                                                 | <i>P</i> 2 <sub>1</sub> / <i>c</i> (n. 14)                                                         | <i>P</i> 2 <sub>1</sub> / <i>c</i> (n. 14)                      |
| <i>a</i> / Å                                                                                                                                        | 10.0155(8)                                                                         | 10.5470(11)                                                                                        | 10.9731(6)                                                      |
| <i>b</i> / Å                                                                                                                                        | 10.1973(8)                                                                         | 9.3472(10)                                                                                         | 10.7934(6)                                                      |
| <i>c</i> / Å                                                                                                                                        | 11.2392(11)                                                                        | 20.660(2)                                                                                          | 13.7310(8)                                                      |
| $\alpha$ / °                                                                                                                                        | 100.5860(10)                                                                       | 90                                                                                                 | 90                                                              |
| $\beta$ / °                                                                                                                                         | 97.6650(10)                                                                        | 98.9680(10)                                                                                        | 95.6060(10)                                                     |
| $\gamma$ / °                                                                                                                                        | 113.6250(10)                                                                       | 90                                                                                                 | 90                                                              |
| <i>V</i> / Å <sup>3</sup> , <i>Z</i> , <i>Z'</i>                                                                                                    | 1006.09(15), 2, 1                                                                  | 2011.9(4), 4, 1                                                                                    | 1618.48(16), 4, 1                                               |
| Reflns for cell determination                                                                                                                       | 5836                                                                               | 4058                                                                                               | 6997                                                            |
| 2 $\theta$ / ° for cell determination                                                                                                               | 4.5–63.5                                                                           | 4.8–40.8                                                                                           | 4.5–62.0                                                        |
| <i>D<sub>x</sub></i> / Mg m <sup>-3</sup>                                                                                                           | 1.612                                                                              | 1.631                                                                                              | 1.576                                                           |
| $\mu$ / mm <sup>-1</sup>                                                                                                                            | 1.386                                                                              | 2.979                                                                                              | 1.227                                                           |
| Colour, habit                                                                                                                                       | brown, prism                                                                       | brown, plate                                                                                       | red, rectangular prism                                          |
| Dimensions / mm                                                                                                                                     | 0.70 × 0.38 × 0.25                                                                 | 0.29 × 0.16 × 0.03                                                                                 | 0.35 × 0.33 × 0.20                                              |
| <i>Data Collection</i>                                                                                                                              |                                                                                    |                                                                                                    |                                                                 |
| Temperature / K                                                                                                                                     | 291(2)                                                                             | 291(2)                                                                                             | 293(2)                                                          |
| radiation $\lambda$ / Å                                                                                                                             | Mo K $\alpha$ , 0.71073                                                            | Mo K $\alpha$ , 0.71073                                                                            | Mo K $\alpha$ , 0.71073                                         |
| Scan type                                                                                                                                           | $\varphi$ and $\omega$                                                             | $\varphi$ and $\omega$                                                                             | $\varphi$ and $\omega$                                          |
| 2 $\theta_{\max}$ / °                                                                                                                               | 65.1                                                                               | 55.0                                                                                               | 60.0                                                            |
| <i>h</i> range                                                                                                                                      | -14→15                                                                             | -13→13                                                                                             | -15→15                                                          |
| <i>k</i> range                                                                                                                                      | -15→15                                                                             | -12→12                                                                                             | -15→15                                                          |
| <i>l</i> range                                                                                                                                      | -16→17                                                                             | -26→26                                                                                             | -19→19                                                          |
| Intensity decay                                                                                                                                     | None                                                                               | None                                                                                               | None                                                            |
| Measured reflections                                                                                                                                | 21696                                                                              | 28896                                                                                              | 30966                                                           |
| Independent reflections                                                                                                                             | 6864                                                                               | 4614                                                                                               | 4717                                                            |
| Reflections with <i>I</i> > 2 $\sigma$ ( <i>I</i> )                                                                                                 | 5915                                                                               | 2787                                                                                               | 4090                                                            |
| <i>R</i> <sub>int</sub>                                                                                                                             | 0.018                                                                              | 0.055                                                                                              | 0.019                                                           |
| <i>Refinement on F<sup>2</sup></i>                                                                                                                  |                                                                                    |                                                                                                    |                                                                 |
| <i>R</i> [ <i>F</i> <sup>2</sup> > 2 $\sigma$ ( <i>F</i> <sup>2</sup> )], <i>wR</i> [ <i>F</i> <sup>2</sup> > 2 $\sigma$ ( <i>F</i> <sup>2</sup> )] | 0.0355, 0.1015                                                                     | 0.0544, 0.1443                                                                                     | 0.0255, 0.0680                                                  |
| <i>S</i>                                                                                                                                            | 1.038                                                                              | 1.039                                                                                              | 1.045                                                           |
| Parameters, restraints                                                                                                                              | 254, 0                                                                             | 273, 1                                                                                             | 226, 0                                                          |
| ( $\Delta$ / $\sigma$ ) <sub>max</sub>                                                                                                              | 0.001                                                                              | 0.001                                                                                              | 0.001                                                           |
| $\Delta\rho_{\max}$ , $\Delta\rho_{\min}$ / e Å <sup>-3</sup>                                                                                       | 0.550, -0.612                                                                      | 0.769, -0.905                                                                                      | 0.356, -0.202                                                   |

**Table S2** Computed excitation energies ( $\lambda_{\max}$  in nm), oscillator strengths ( $f$ ), difference between excited and ground state dipole moment ( $\Delta\mu_{\text{eg}}$ , in D), when available, and analysis of the most important contributions to the transitions for compounds **3** and selected analogue copper(II) complexes **Cu3a** and **Cu3l**.<sup>a</sup>

|           | A               | D               | $\lambda_{\max}, \Delta\mu_{\text{eg}}$ | $f$   | assignment               | $\lambda_{\max}, \Delta\mu_{\text{eg}}$ | $f$   | assignment                      | $\lambda_{\max}, \Delta\mu_{\text{eg}}$ | $f$   | assignment                        |
|-----------|-----------------|-----------------|-----------------------------------------|-------|--------------------------|-----------------------------------------|-------|---------------------------------|-----------------------------------------|-------|-----------------------------------|
| <b>3a</b> | H               | H               | 401                                     | 0.023 | H → L (84%) <sup>b</sup> | 349                                     | 0.032 | H-1 → L (84%)                   | 329                                     | 0.034 | H-1 → L+1 (94%)                   |
|           |                 |                 | 381                                     | 0.064 | H → L+1 (92%)            |                                         |       |                                 |                                         |       |                                   |
| <b>3b</b> | H               | Me              | 406                                     | 0.027 | H → L (85%) <sup>b</sup> | 352                                     | 0.025 | H-1 → L (82%)                   | 335                                     | 0.043 | H-1 → L+1 (94%)                   |
|           |                 |                 | 387                                     | 0.059 | H → L+1 (92%)            |                                         |       |                                 |                                         |       |                                   |
| <b>3c</b> | H               | OMe             | 424, -1.41                              | 0.043 | H → L (88%) <sup>b</sup> | 362, -0.52                              | 0.015 | H-1 → L (67%)                   | 346, -1.40                              | 0.020 | H → L+2 (38%)                     |
|           |                 |                 | 399, 7.12                               | 0.043 | H → L+1 (93%)            |                                         |       |                                 | 343, 2.36                               | 0.050 | H-1 → L+1 (93%)                   |
| <b>3d</b> | Br              | Br              | 413                                     | 0.028 | H → L (84%) <sup>b</sup> | 364                                     | 0.030 | H-1 → L (87%)                   | 343                                     | 0.029 | H-1 → L+1 (96%)                   |
|           |                 |                 | 393                                     | 0.062 | H → L+1 (92%)            |                                         |       |                                 |                                         |       |                                   |
| <b>3e</b> | Br              | H               | 403                                     | 0.014 | H → L (78%) <sup>b</sup> | 351                                     | 0.033 | H-1 → L (73%)                   | 342                                     | 0.029 | H-1 → L+1 (86%)                   |
|           |                 |                 | 391                                     | 0.075 | H → L+1 (83%)            |                                         |       |                                 |                                         |       |                                   |
| <b>3f</b> | Br              | Me              | 409                                     | 0.013 | H → L (87%) <sup>b</sup> | 354                                     | 0.029 | H-1 → L (68%)                   | 348                                     | 0.033 | H-1 → L+1 (86%)                   |
|           |                 |                 | 397                                     | 0.073 | H → L+1 (89%)            |                                         |       |                                 | 337                                     | 0.011 | H → L+2 (49%)                     |
| <b>3g</b> | Br              | OMe             | 425                                     | 0.024 | H → L (85%) <sup>b</sup> | 365                                     | 0.017 | H-1 → L (68%)                   | 357                                     | 0.050 | H-1 → L+1 (87%)                   |
|           |                 |                 | 413                                     | 0.060 | H → L+1 (90%)            |                                         |       |                                 | 349                                     | 0.017 | H → L+2 (32%)                     |
| <b>3h</b> | NO <sub>2</sub> | NO <sub>2</sub> | 383                                     | 0.072 | H → L (84%) <sup>b</sup> | 336                                     | 0.024 | H-1 → L (78%)                   | 329                                     | 0.467 | H → L+2 (52%)                     |
|           |                 |                 | 364                                     | 0.088 | H → L+1 (85%)            |                                         |       |                                 | 323                                     | 0.022 | H → L+3 (40%)                     |
|           |                 |                 |                                         |       |                          |                                         |       |                                 | 318                                     | 0.017 | H → L+4 (36%)                     |
|           |                 |                 |                                         |       |                          |                                         |       |                                 | 314                                     | 0.031 | H-1 → L+1 (52%)                   |
| <b>3i</b> | NO <sub>2</sub> | Br              | 403                                     | 0.041 | H → L (79%) <sup>b</sup> | 349                                     | 0.074 | H → L+2 (75%)                   | 335                                     | 0.061 | H-1 → L+1 (42%),<br>H-1 → L (30%) |
|           |                 |                 | 387                                     | 0.066 | H → L+1 (76%)            | 346                                     | 0.067 | H → L+3 (37%),<br>H-1 → L (31%) |                                         |       |                                   |
| <b>3j</b> | NO <sub>2</sub> | H               | 394, 5.39                               | 0.032 | H → L (66%) <sup>b</sup> | 350, 19.94                              | 0.110 | H → L+2 (77%)                   | 333, 6.12                               | 0.052 | H-1 → L (56%)                     |
|           |                 |                 | 382, 1.24                               | 0.076 | H → L+1 (78%)            | 339, 3.34                               | 0.035 | H → L+3 (35%),<br>H-1 → L (25%) |                                         |       |                                   |
| <b>3k</b> | NO <sub>2</sub> | Me              | 404                                     | 0.031 | H → L (67%) <sup>b</sup> | 362                                     | 0.074 | H → L+2 (75%)                   | 338                                     | 0.081 | H-1 → L (73%)                     |
|           |                 |                 | 392                                     | 0.068 | H → L+1 (81%)            | 348                                     | 0.030 | H → L+3 (50%),                  |                                         |       |                                   |



|             |                 |     |     |       |                            | H-1 → L (9%)  |       |               |     |       |               |
|-------------|-----------------|-----|-----|-------|----------------------------|---------------|-------|---------------|-----|-------|---------------|
| <b>3l</b>   | NO <sub>2</sub> | OMe | 424 | 0.029 | H → L (68%) <sup>b</sup>   | 381           | 0.041 | H → L+2 (76%) | 343 | 0.108 | H-1 → L (79%) |
|             |                 |     | 413 | 0.063 | H → L+1 (79%)              | 366           | 0.025 | H → L+3 (59%) |     |       |               |
| <b>Cu3a</b> | H               | H   | 411 | 0.043 | H → L (73%) <sup>b,c</sup> |               |       |               |     |       |               |
| <b>Cu3l</b> | NO <sub>2</sub> | OMe | 498 | 0.014 | H → L (46%) <sup>b,c</sup> |               |       |               |     |       |               |
|             |                 |     |     |       |                            | H-1 → L (35%) |       |               |     |       |               |

<sup>a</sup> Calculations performed at (TD)PBE0/6-311++G(d,p) level of theory. Unrestricted formalism used for copper(II) complexes. Only transitions with  $f > 0.010$  are reported. <sup>b</sup> H = HOMO, L = LUMO. Main atomic contributions to H, L and L+1: **3a**, H = 0.12 p<sub>O1</sub>, 0.12 p<sub>O2</sub>, 0.11 d<sub>Ni</sub>; L = 0.30 p<sub>C17</sub>, 0.15 p<sub>N2</sub>, 0.12 p<sub>C13</sub>, 0.10 p<sub>C15</sub>; L+1 = 0.31 p<sub>C4</sub>, 0.16 p<sub>N2</sub>, 0.15 p<sub>C8</sub>, 0.11 p<sub>C6</sub>. **3b**, H = 0.14 p<sub>O2</sub>, 0.12 p<sub>C16</sub>, 0.10 d<sub>Ni</sub>; L = 0.30 p<sub>C17</sub>, 0.14 p<sub>N2</sub>, 0.13 p<sub>C13</sub>, 0.10 p<sub>C15</sub>; L+1 = 0.31 p<sub>C4</sub>, 0.16 p<sub>N1</sub>, 0.14 p<sub>C8</sub>, 0.11 p<sub>C6</sub>. **3c**, H = 0.15 p<sub>O2</sub>, 0.12 p<sub>C14</sub>, 0.11 p<sub>C16</sub>, 0.07 d<sub>Ni</sub>; L = 0.29 p<sub>C17</sub>, 0.14 p<sub>N2</sub>, 0.14 p<sub>C13</sub>, 0.10 p<sub>C15</sub>; L+1 = 0.31 p<sub>C4</sub>, 0.16 p<sub>N1</sub>, 0.15 p<sub>C8</sub>, 0.11 p<sub>C6</sub>. **3d**, H = 0.10 p<sub>O1</sub>, 0.10 p<sub>O2</sub>, 0.09 d<sub>Ni</sub>; L = 0.29 p<sub>C17</sub>, 0.15 p<sub>N2</sub>, 0.12 p<sub>C13</sub>, 0.11 p<sub>C15</sub>; L+1 = 0.30 p<sub>C4</sub>, 0.16 p<sub>N1</sub>, 0.15 p<sub>C8</sub>, 0.11 p<sub>C6</sub>. **3e**, H = 0.11 p<sub>O1</sub>, 0.11 p<sub>O2</sub>, 0.10 d<sub>Ni</sub>; L = 0.24 p<sub>C17</sub>, 0.11 p<sub>N2</sub>, 0.09 p<sub>C13</sub>, 0.08 p<sub>C15</sub>; L+1 = 0.24 p<sub>C4</sub>, 0.13 p<sub>N1</sub>, 0.12 p<sub>C8</sub>, 0.09 p<sub>C6</sub>. **3f**, H = 0.14 p<sub>O2</sub>, 0.12 p<sub>C14</sub>, 0.09 p<sub>C16</sub>, 0.09 d<sub>Ni</sub>; L = 0.18 p<sub>C17</sub>, 0.11 p<sub>C4</sub>, 0.09 p<sub>N2</sub>; L+1 = 0.18 p<sub>C4</sub>, 0.12 p<sub>C17</sub>, 0.10 p<sub>N1</sub>, 0.10 p<sub>C8</sub>, 0.07 p<sub>C6</sub>. **3g**, H = 0.15 p<sub>O2</sub>, 0.12 p<sub>C14</sub>, 0.11 p<sub>C16</sub>, 0.07 p<sub>O3</sub>, 0.07 d<sub>Ni</sub>; L = 0.24 p<sub>C17</sub>, 0.12 p<sub>N2</sub>, 0.11 p<sub>C13</sub>, 0.08 p<sub>C15</sub>; L+1 = 0.25 p<sub>C4</sub>, 0.14 p<sub>N1</sub>, 0.13 p<sub>C8</sub>, 0.10 p<sub>C6</sub>. **3h**, H = 0.11 d<sub>Ni</sub>, 0.11 p<sub>O2</sub>, 0.11 p<sub>O1</sub>, 0.09 p<sub>C7</sub>, 0.09 p<sub>C14</sub>; L = 0.27 p<sub>C17</sub>, 0.16 p<sub>C15</sub>, 0.15 p<sub>N2</sub>; L+1 = 0.24 p<sub>C4</sub>, 0.20 p<sub>C6</sub>, 0.14 p<sub>N1</sub>. **3i**, H = 0.17 p<sub>O2</sub>, 0.15 p<sub>C14</sub>, 0.11 p<sub>C16</sub>, 0.10 p<sub>Br</sub>, 0.10 p<sub>C12</sub>, 0.07 d<sub>Ni</sub>; L = 0.19 p<sub>C17</sub>, 0.10 p<sub>N2</sub>, 0.08 p<sub>C6</sub>, 0.08 p<sub>C13</sub>, 0.07 p<sub>C15</sub>; L+1 = 0.15 p<sub>C6</sub>, 0.15 p<sub>C4</sub>, 0.10 p<sub>C17</sub>, 0.09 p<sub>N1</sub>. **3j**, H = 0.18 p<sub>O2</sub>, 0.17 p<sub>C14</sub>, 0.11 p<sub>C16</sub>, 0.11 p<sub>C12</sub>, 0.09 d<sub>Ni</sub>; L = 0.21 p<sub>C6</sub>, 0.18 p<sub>C4</sub>, 0.12 p<sub>N1</sub>, 0.10 p<sub>N3</sub>, 0.10 p<sub>O3</sub>, 0.08 p<sub>O4</sub>; L+1 = 0.27 p<sub>C17</sub>, 0.13 p<sub>N12</sub>, 0.11 p<sub>C13</sub>, 0.09 p<sub>C15</sub>, 0.09 d<sub>Ni</sub>. **3k**, H = 0.18 p<sub>O2</sub>, 0.17 p<sub>C14</sub>, 0.12 p<sub>C16</sub>, 0.10 p<sub>C12</sub>, 0.08 d<sub>Ni</sub>; L = 0.22 p<sub>C6</sub>, 0.18 p<sub>C4</sub>, 0.12 p<sub>N1</sub>, 0.10 p<sub>N3</sub>, 0.10 p<sub>O3</sub>, 0.09 p<sub>O4</sub>; L+1 = 0.27 p<sub>C17</sub>, 0.13 p<sub>N2</sub>, 0.12 p<sub>C13</sub>, 0.10 p<sub>C15</sub>, 0.09 d<sub>Ni</sub>. **3l**, H = 0.16 p<sub>O2</sub>, 0.14 p<sub>C14</sub>, 0.12 p<sub>C16</sub>, 0.09 p<sub>O3(Me)</sub>, 0.09 p<sub>C15</sub>, 0.08 p<sub>C12</sub>, 0.07 p<sub>N2</sub>, 0.06 p<sub>C11</sub>, 0.05 d<sub>Ni</sub>; L = 0.22 p<sub>C6</sub>, 0.18 p<sub>C4</sub>, 0.12 p<sub>N1</sub>, 0.10 p<sub>N3</sub>, 0.10 p<sub>O4(NO2)</sub>, 0.09 p<sub>O5(NO2)</sub>; L+1 = 0.26 p<sub>C17</sub>, 0.13 p<sub>N2</sub>, 0.13 p<sub>C13</sub>, 0.09 p<sub>C15</sub>, 0.08 p<sub>C11</sub>, 0.07 d<sub>Ni</sub>. **Cu3a**, H = 0.13 p<sub>O1</sub>, 0.12 p<sub>C7</sub>, 0.11 p<sub>O2</sub>, 0.10 p<sub>C14</sub>, 0.09 p<sub>C5</sub>, 0.08 p<sub>C9</sub>, 0.07 p<sub>C16</sub>, 0.06 p<sub>C12</sub>; L = 0.61 d<sub>Cu</sub>, 0.07 p<sub>O1</sub>, 0.07 p<sub>O2</sub>. **Cu3l**, H = 0.16 p<sub>O2</sub>, 0.16 p<sub>C14</sub>, 0.12 p<sub>C16</sub>, 0.10 p<sub>O3(Me)</sub>, 0.10 p<sub>C15</sub>, 0.08 p<sub>C12</sub>, 0.08 p<sub>C11</sub>, 0.07 p<sub>N2</sub>; L = 0.59 d<sub>Cu</sub>, 0.08 p<sub>O2</sub>, 0.06 p<sub>O1</sub>. <sup>c</sup>Singularly occupied orbitals.

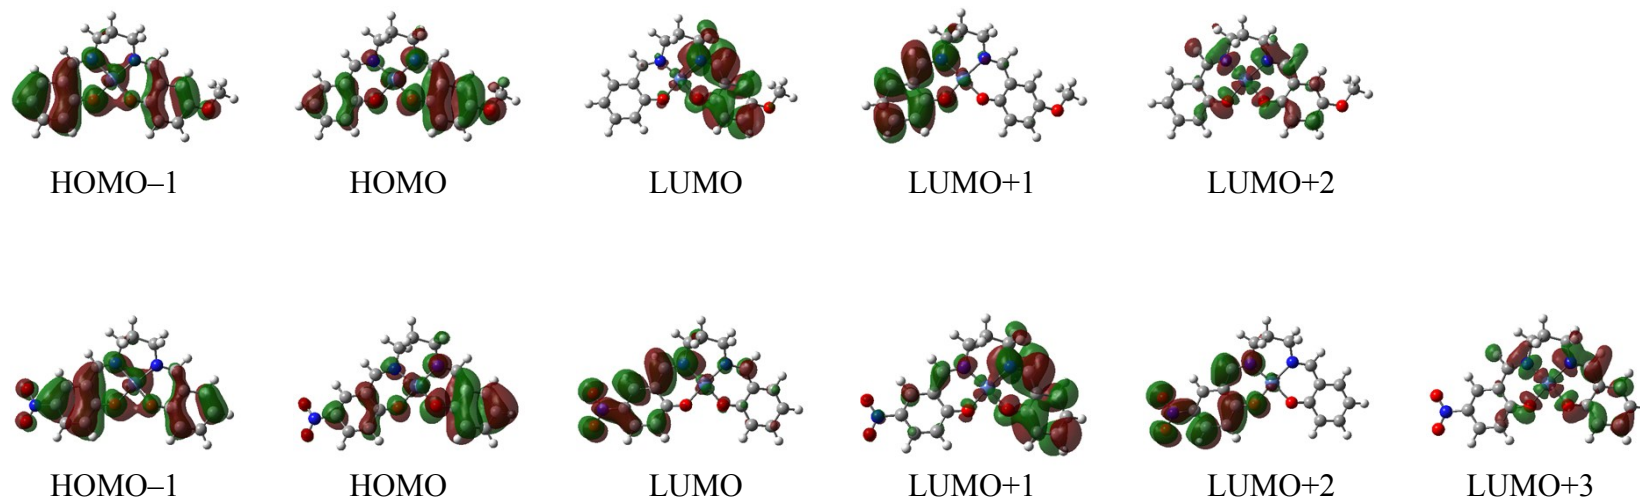

**Fig. S1** Isodensity surface plot of the PBE0/6-311++G(d,p) frontier orbitals of **3c** (top) and **3j** (bottom) mainly involved in the computed transitions (isosurface values: 0.02).

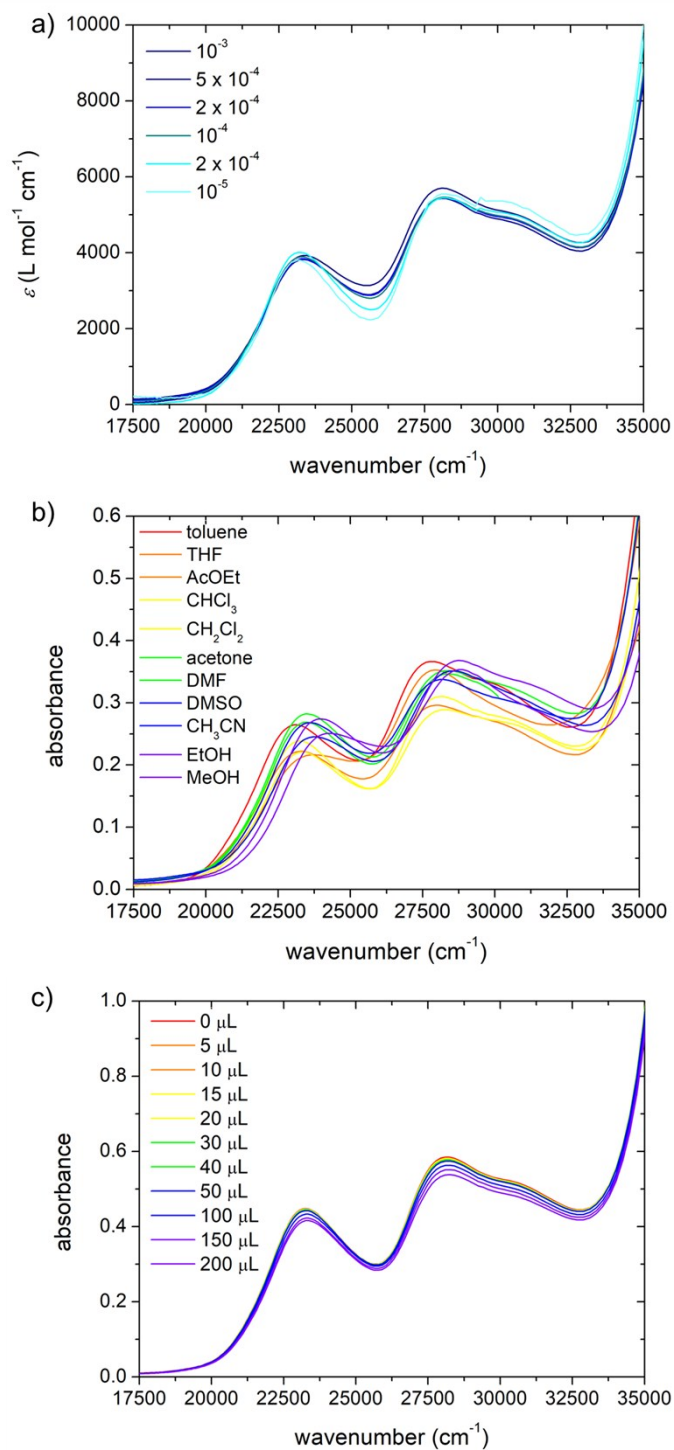

**Fig. S2** UV-visible absorption spectra of **3c**: a) dilution studies from  $10^{-3}$  down to  $10^{-5} \text{ mol L}^{-1}$   $\text{CHCl}_3$  solutions, b) solvatochromism at  $5 \times 10^{-5} \text{ mol L}^{-1}$  solutions in solvents from low polar toluene (red) to high polar methanol (violet), and c) addition of increasing amount of DMSO ( $\mu\text{L}$ ) to the  $10^{-4} \text{ mol L}^{-1}$   $\text{CHCl}_3$  solution (2 mL) (data were not corrected for the dilution given by the addition of DMSO).

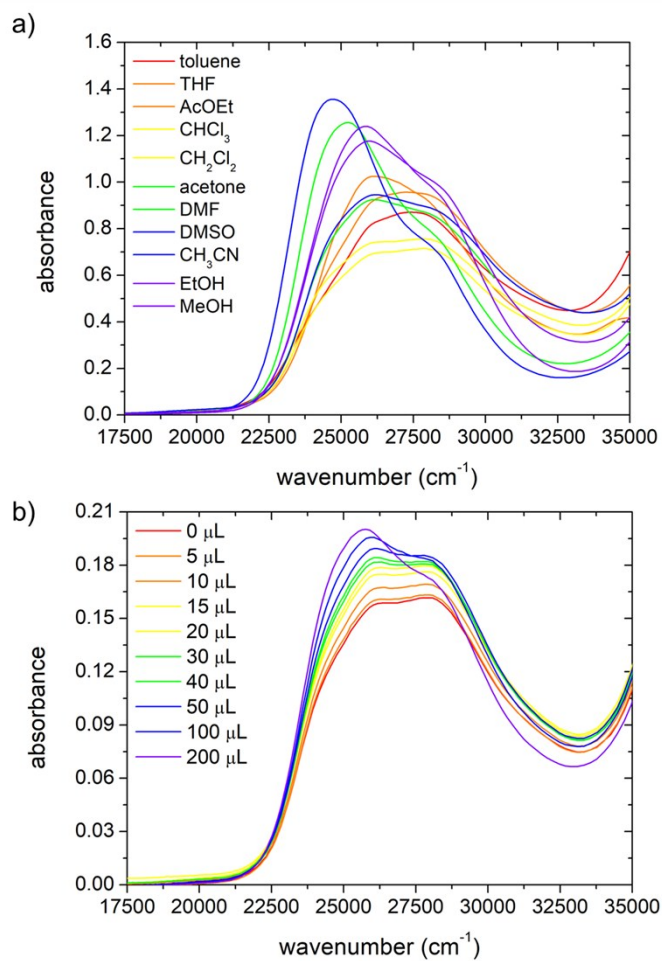

**Fig. S3** UV-visible absorption spectra of **3j**: a) solvatochromism at  $5 \times 10^{-5}$  mol L<sup>-1</sup> solutions in solvents from low polar toluene (red) to high polar methanol (violet), and b) addition of increasing amount of DMSO (μL) to the  $10^{-4}$  mol L<sup>-1</sup> CHCl<sub>3</sub> solution (2 mL) (optical path of 0.1 cm, data were not corrected for the dilution given by the addition of DMSO).

## References

- 1 G. C. Percy and D. A. Thornton, *J. Inorg. Nucl. Chem.*, 1973, **35**, 2719–2726.
- 2 J. B. Hodgson and G. C. Percy, *Spectrochim. Acta A: Mol. Spectr.*, 1978, **34**, 777–780.
- 3 G. N. Tyson and S. C. Adams, *J. Am. Chem. Soc.*, 1940, **62**, 1228–1229.
- 4 R. H. Holm, *J. Am. Chem. Soc.*, 1961, **83**, 4683–4690.
- 5 J. Chakraborty, M. Nandi, H. Mayer-Figge, W. S. Sheldrick, L. Sorace, A. Bhaumik and P. Banerjee, *Eur. J. Inorg. Chem.*, 2007, **2007**, 5033–5044.
- 6 R. C. Elder, *Aus. J. Chem.*, 1978, **31**, 35–45.
- 7 A. Elmali, C. T. Zeyrek, Y. Elerman and I. Svoboda, *Acta Crystallogr. C*, 2000, **56**, 1302–1304.
- 8 O. Atakol, S. Durmus, Z. Durmus, C. Arici and B. Çiçek, *Synth. React. Inorg. Met.-Org. Chem.*, 2001, **31**, 1689–1704.
